# Supplementary material for: Palladium catalysed Suzuki reactions of fluoroarenesElectronic supplementary information (ESI) available: full experimental procedures and data. See http://www.rsc.org/suppdata/cc/b2/b212138g/
Source: Royal Society of Chemistry journal article supplement (doi:10.1039/b212138g), 2003-02-20
Supplement: b212138g.doc [file b212138g.doc]

# Supplementary data

Palladium Catalysed Suzuki Reactions of Fluoroarenes

**David A. Widdowson and René Wilhelm**

Department of Chemistry, Imperial College of Science Technology and Medicine, London SW7 2AZ, UK

d.widdowson@ic.ac.uk

**Experimental**

Reactions were carried out under nitrogen and were performed using standard Schlenk line techniques.1 DME was distilled from sodium benzophenone ketyl. Cesium carbonate, Pd2(dba)3, fluorobenzenes and boronic acids were obtained from Lancaster and used without further purification. Trimethylphosphine was used as received from the Sigma-Aldrich Company as a 1 M solution in THF.

Flash column chromatography2 was performed on Sorbisil C-60. All reactions were monitored by TLC with Merk Silica gel 60 F254 plates.

Elemental analyses were carried out by Mr Stephen Boyer, SACS, University of North London and are reported as the average of two runs. Infrared spectra were recorded on a Mattson Satellite FTIR instrument. NMR spectra were performed, if not otherwise stated, in CDCl3 at ambient temperature on a Jeol GSX 270 (270 MHz 1H and68 MHz 13C). Mass spectra were recorded on VG Micromass 7070E and AutoSpec-Q spectrometers. Melting points were taken on a Kofler hot stage apparatus and are uncorrected.

**General procedure for the coupling of fluoroarenes with arylboronic acids.**

A solution of a fluoroarene (1 equiv., 1.29 mmol), arylboronic acid (2 equiv., 2.58 mmol), cesium carbonate (2.2 equiv., 0.925 g, 2.84 mmol), Pd2(dba)3 (5 mol%, 0.060 g, 0.06 mmol) and trimethylphosphine (20 mol%, 0.26 mL, 1 molar solution in THF, 0.26 mmol) in deoxygenated DME (9 mL) was stirred under reflux for 16 h. Ethyl acetate (40 mL) was added and the solution was washed with 10% NaOH (10 mL), water (10 mL) and brine (10 mL) and dried (MgSO4). Concentration in vacuo followed by column chromatography (FCC) and recrystallisation or distillation in a Kugelrohr were necessary gave the desired biaryl.

**2,4-Dinitrobiphenyl (3a)**

From Sanger´s reagent (**1a**) (0.16 mL, 1.29 mmol) and phenylboronic acid (**2a**) (0.320 g, 2.58 mmol); FCC (eluant: 15% ether–hexane) gave the title product (**3a**) as a white crystalline solid (0.270 g, 1.10 mmol, 85%), mp 109–110 °C (lit.3 110 °C). (Found: C, 59.27; H, 3.18; N, 11.30. C12H8N2O4 requires: C, 59.02; H, 3.30; N, 11.47%). max (KBr)/cm–1 3094w, 1604s, 1345s, 742m, 698s. H (270 MHz) 8.70 (1 H, d, *J* 2.2 Hz, Ar(3)*H*), 8.46 (1 H, dd, *J* 2.5, 8.7 Hz, Ar(5)*H*), 7.68 (1 H, d, *J* 8.4 Hz, Ar(6)*H*), 7.50–7.31 (5 H, m, Ph*H*); C (68 MHz) 149.1 (Ar*C*(2/4)-NO2), 147.0 (Ar*C*(2/4)-NO2), 143.8 (Ar*C*(1)‑Ph), 142.4 (Ph*C*(1')-Ar), 133.4 (Ar*C*(5)H), 129.7 (Ar*C*(6)H), 129.2 (Ph*C*(2',6')H), 127.8 (Ph*C*(3',5')H), 126.7 (Ph*C*(4')H), 119.9 (Ar*C*(3)H). *m/z* (EI) 244 (*M*+, 46%), 227 (*M*+– OH, 44), 216 (100), 199 (*M*+– NO2 + H, 13), 168 (*M*+– Ph + H, 40), 151 (*M*+– 2  NO2 + H, 81), 139 (81). Found: *M*+ 244.0486. C12H8N2O4 requires: 244.0484. The 13C-NMR spectrum was consistent with literature value.4

**2,4-Dinitro-2'-methylthiobiphenyl (3b)**

From Sanger´s reagent (**1a**) (0.16 mL, 1.29 mmol) and 2-thiolbenzeneboronic acid (**2b**) (0.435 g, 2.58 mmol); FCC (eluant: 15% ether–hexane) and recrystallisation from methanol gave the *title product* (**3b**) as big large crystals (0.315 g, 1.08 mmol, 84%), mp 120–121 °C. (Found: C, 53.85; H, 3.54; N, 9.52. C13H10N2O4S requires: C, 53.75; H, 3.47; N, 9.65%). max (CHCl3)/cm–1 1601m, 1533s, 1348s, 834m. H (270 MHz) 8.89 (1 H, d, *J* 2.5 Hz, Ar(3)*H*), 8.48 (1 H, dd, *J* 2.5, 8.4 Hz, Ar(5)*H*), 7.61 (1 H, d, *J* 8.4 Hz, Ar(6)*H*), 7.43–7.11 (4 H, m, Ar*H*), 2.37 (3 H, s, S*Me*); C (68 MHz) 149.0 (Ar*C*(2/4)-NO2), 147.6 (Ar*C*(2/4)-NO2), 141.6 (Ar*C*(1)‑Ar), 136.8 (Ar*C*(2')-SMe), 135.4 (Ar*C*(1')-Ar), 134.3 (Ar*C*(5)H), 129.8 (Ar*C*(6)H), 128.4, 127.2, 127.0, 125.9, 120.0 (Ar*C*H). *m/z* (EI) 290 (*M*+, 10%), 244 (*M*+– NO2, 40), 199 (*M*+– 2  NO2 + H, 61), 184 (199 – Me, 55). Found: *M*+ 290.0350. C13H10N2O4S requires: 290.03613.

**2,4-Dinitro-4'-methoxybiphenyl (3c)**

From Sanger´s reagent (**1a**) (0.16 mL, 1.29 mmol) and 4-methoxybenzeneboronic acid (**2c**) (0.392 g, 2.58 mmol); FCC (eluant: 15% ether–hexane) and recrystallisation from methanol gave the title product (**3c**) as a yellow crystalline solid (0.290 g, 1.05 mmol, 81%), mp 93-94 °C (lit.3 94-95 °C). (Found: C, 57.02; H, 3.73; N, 10.21. C13H10N2O5 requires: C, 56.94; H, 3.68; N, 10.22%). max (CHCl3)/cm–1 1604s, 1530s, 1350s, 1257s, 1180m, 834m. H (270 MHz) 8.63 (1 H, d, *J* 2.5 Hz, Ar(3)*H*), 8.41 (1 H, dd, *J* 2.2, 8.4 Hz, Ar(5)*H*), 7.64 (1 H, d, *J* 8.7 Hz, Ar(6)*H*), 7.27 (2 H, d, *J* 8.9 Hz, Ar(2',6')H), 6.97 (2 H, d, *J* 8.9 Hz, Ar(3',5')H), 3.85 (3 H, s, O*Me*); C (68 MHz) 160.9 (Ar*C*(4')-OMe), 149.2 (Ar*C*(2/4)-NO2), 146.5 (Ar*C*(2/4)-NO2), 141.9 (Ar*C*(1)‑Ar), 133.1 (Ar*C*(5)H), 129.3 (Ar*C*(2',6')H), 127.2 (Ar*C*(1')-Ar), 126.4 (Ar*C*(6)H), 119.8 (Ar*C*(3)H), 114.8 (Ar*C*(3',5')H), 55.5 (O*Me*). *m/z* (EI) 274 (*M*+, 100%), 257 (*M*+– OH, 15), 229 (*M*+– NO2 + H, 13), 182 (*M*+– 2  NO2 + H, 16), 139 (70). Found: *M*+ 274.0593. C13H10N2O5 requires: 274.0590. The IR and H-NMR data were consistent with literature value.5

**2,4-Dinitro-2'-methoxybiphenyl (3d)**

From Sanger´s reagent (**1a**) (0.16 mL, 1.29 mmol) and 2-methoxybenzeneboronic acid (**2d**) (0.392 g, 2.58 mmol); FCC (eluant: 15% ether–hexane) and recrystallisation from methanol gave the title product (**3d**) as a yellow crystalline solid (0.295 g, 1.07 mmol, 83%), mp 124-126 °C (lit.3 126-127 °C). (Found: C, 57.03; H, 3.59; N, 9.99. C13H10N2O5 requires: C, 56.94; H, 3.68; N, 10.22%). max (CHCl3)/cm–1 1608m, 1542s, 1347s, 1249m, 1026m, 835m. H (270 MHz) 8.75 (1 H, d, *J* 2.2 Hz, Ar(3)*H*), 8.45 (1 H, dd, *J* 2.5, 8.4 Hz, Ar(5)*H*), 7.62 (1 H, d, *J* 8.4 Hz, Ar(6)*H*), 7.47–6.87 (4 H, m, ArH), 3.69 (3 H, s, O*Me*); C (68 MHz) 155.7 (Ar*C*(2')-OMe), 149.6 (Ar*C*(2/4)-NO2), 146.8 (Ar*C*(2/4)-NO2), 139.5 (Ar*C*(1)‑Ar), 133.8, 131.3, 129.6, 126.9 (Ar*C*H), 125.0 (Ar*C*(1')-Ar), 121.6, 119.6, 111.0 (Ar*C*H), 55.2 (O*Me*). *m/z* (EI) 274 (*M*+, 100%), 243 (*M*+– MeO, 10), 181 (*M*+– 2  NO2, 16), 139 (50). Found: *M*+ 274.0598. C13H10N2O5 requires: 274.0590. The spectral data were consistent with literature value.6

**2-(2,4-Dinitrophenyl)furan (3e)**

From Sanger´s reagent (**1a**) (0.16 mL, 1.29 mmol) and 2-furylboronic acid (**2e**) (0.290 g, 2.58 mmol); FCC (eluant: 10% DCM–hexane) gave the *title product* (**3e**) as a yellow crystalline solid (0.250 g, 1.07 mmol, 83%), mp 53-54 °C. (Found: C, 51.39; H, 2.46; N, 11.98. C10H6N2O5 requires: C, 51.29; H, 2.58; N, 11.96%). max (CHCl3)/cm–1 1607s, 1604s, 1543s, 1530s, 1347s, 1261m, 1016m, 818m. H (270 MHz) 8.48 (1 H, d, *J* 2.2 Hz, Ar(3**'**)*H*), 8.39 (1 H, dd, *J* 2.2, 8.7 Hz, Ar(5**'**)*H*), 7.95 (1 H, d, *J* 8.7 Hz, Ar(6**'**)*H*), 7.50–7.31 (5 H, m, Ph*H*); C (68 MHz) 146.3 (Ar*C*(2)-Ar), 146.2 (Ar*C*(2/4)-NO2), 146.1 (Ar*C*(2/4)-NO2), 145.8 (Ar*C*(5)H), 129.0 (Ar*C*(5')H), 128.9.1 (Ar*C*(1')‑Ar), 126.2 (Ar*C*(6')H), 119.7 (Ar*C*(3')H), 113.6 (Ar*C*(4')H), 113.0 (Ar*C*(3')H). *m/z* (EI) 234 (*M*+, 85%), 217 (*M*+– OH, 22), 189 (*M*+– NO2 + H, 50), 142 (*M*+– 2  NO2 + H, 40). Found: *M*+ 234.02934. C10H6N2O5 requires: 234.02767.

**4'-Chloro-2,4-dinitrobiphenyl (3f)**

From Sanger´s reagent (**1a**) (0.16 mL, 1.29 mmol) and 4-chlorobenzeneboronic acid (**2e**) (0.403 g, 2.58 mmol); FCC (eluant: 10% DCM–hexane) gave the *title product* (**3f**) as a white solid (0.240 g, 0.85 mmol, 66%), mp 84-86 °C. (Found: C, 51.81; H, 2.47; N, 9.93. C12H7N2O4Cl requires: C, 51.72; H, 2.53; N, 10.05%). max (CHCl3)/cm–1 1603s, 1541s, 1349s, 1261m, 1096m, 1007m, 826m. H (270 MHz) 8.69 (1 H, d, *J* 2.5 Hz, Ar(3)*H*), 8.45 (1 H, dd, *J* 2.2, 8.4 Hz, Ar(5)*H*), 7.65 (1 H, d, *J* 8.4 Hz, Ar(6)*H*), 7.42 (2 H, d, *J* 8.4 Hz, Ar(2',6')H), 7.26 (2 H, d, *J* 8.7 Hz, Ar(3',5')H); C (68 MHz), 148.9 (Ar*C*(2/4)-NO2), 147.1 (Ar*C*(2/4)-NO2), 141.2 (Ar*C*(1)‑Ar), 136.0 (Ar*C*(1')-Ar), 133.8 (Ar*C*(4')-Cl), 133.3 (Ar*C*(5)H), 129.4 (Ar*C*(2',6')H), 129.1 (Ar*C*(3',5')H), 126.8 (Ar*C*(6)H), 120.0 (Ar*C*(3)H). *m/z* (EI) 278 (*M*+, 95%), 261 (*M*+– OH, 10), 233 (*M*+– NO2 + H, 20), 186 (*M*+– 2  NO2, 40). Found: *M*+ 278.0089. C12H7N2O4Cl requires: 278.0094.

**3'-Amino-2,4-dinitrobiphenyl (3g)**

From Sanger´s reagent (**1a**) (0.16 mL, 1.29 mmol) and 3-aminobenzeneboronic acid hemisulfate (**2f**) (0.959 g, 2.58 mmol); FCC (eluant: 15% ether–hexane) and recrystallisation from methanol gave 250 mg of a brown solid identified by 1H-NMR and HRMS as the crude *title product* (**3g**) of approx. 50% purity.

H (270 MHz) 8.64 (1 H, d, *J* 2.2 Hz, Ar(3)*H*), 8.41 (1 H, dd, *J* 2.2, 8.4 Hz, Ar(5)*H*), 7.65 (1 H, d, *J* 8.4 Hz, Ar(6)*H*), 7.53-6.59 (4 H, m, Ar*H*), 3.80 (2 H, br, NH2); *m/z* (EI) 259 (*M*+, 11%), 242 (*M*+– OH, 5), 166 (*M*+– 2  NO2, 10). Found: *M*+ 259.0595. C12H9N3O4 requires: 259.0593.

**4'-*tert*-Butyl-2,4-dinitrobiphenyl (3h)**

From Sanger´s reagent (**1a**) (0.16 mL, 1.29 mmol) and 4-*t*-butylbenzeneboronic acid (**2g**) (0.458 g, 2.58 mmol); FCC (eluant: 10% DCM–hexane) gave the *title product* (**3h**) as a yellow oil (0.280 g, 1.02 mmol, 79%). (Found: C, 64.13; H, 5.29; N, 9.21. C16H16N2O4 requires: C, 63.99; H, 5.37; N, 9.33%). nmax (neat)/cm–1 2965s, 1603s, 1530s, 1347s, 736s. dH (270 MHz) 8.65 (1 H, d, *J* 2.2 Hz, Ar(3)*H*), 8.43 (1 H, dd, *J* 2.5, 8.4 Hz, Ar(5)*H*), 7.67 (1 H, d, *J* 8.6 Hz, Ar(6)*H*), 7.49 (2 H, d, *J* 8.6 Hz, Ar(3,5)*H*), 7.28 (2 H, d, *J* 8.6 Hz, Ar(2,6)*H*), 1.35 (3 H, s, *Me*); dC (68 MHz) 153.0 (Ar*C*(4')-CMe3), 149.2 (Ar*C*(2/4)-NO2), 146.7 (Ar*C*(2/4)-NO2), 142.3 (Ar*C*(1)‑Ar), 133.3 (Ar*C*H), 133.2 (Ar*C*(1')-Ar), 127.6 (Ar*C*(2,6)H), 126.5 (Ar*C*H), 126.2 (Ar*C*(3,5)H), 119.7 (Ar*C*H), 34.9 (*C*Me3), 31.3 (*Me*). *m/z* (EI) 300 (*M*+, 5%), 285 (*M*+– Me, 100), 251 (15), 165 (24). Found: *M*+ 300.1188. C16H16N2O4 requires: 300.1110.

**2-Nitrobiphenyl (3i)**

From 2-fluoronitrobenzene (**1b**) (0.14 mL, 1.29 mmol) and phenylboronic acid (0.320 g, 2.58 mmol); FCC (eluant: 5% ether–hexane) gave the title product (**3i**) as a solid (0.067 g, 0.34 mmol, 26%) mp 34-35°C (mp lit.7 37 °C). (Found: C, 72.51; H, 4.65; N, 7.17. C12H9NO2 requires: C, 72.35; H, 4.55; N, 7.03%). max (KBr)/cm–1 1605m, 1525s, 1354s, 740s, 698s. H (270 MHz) 7.86–7.29 (9 H, m, Ar*H*); C (68 MHz) 149.3 (Ar*C*(2)-NO2), 137.3 (Ar*C*(1)-Ph), 136.4 (Ph*C*(1')-Ar), 132.3 (Ar*C*(5)H), 132.0 (Ar*C*(3)H), 128.9 (Ph*C*(2',6')H), 128.3 (Ar*C*(4)H), 128.2 (Ar*C*(6)H), 127.9 (Ph*C*(3',5')H), 124.1 (Ph*C*(4')H). *m/z* (EI) 199 (*M*+, 7%), 182 (*M*+– O + H, 8), 171 (13), 154 (*M*+– NO2 + H, 5), 151 (41), 115 (22), 43 (100). Found: *M*+ 199.0626. C12H9NO2 requires: 199.0633. The spectral data were consistent with literature value.8, 9

**2-Nitro-4'-methoxybiphenyl (3j)**

From 2-fluoronitrobenzene (**1b**) (0.14 mL, 1.29 mmol) and 4-methoxybenzenelboronic acid (0.392 g, 2.58 mmol); FCC (eluant: 5% ether–hexane) and recrystallisation from methanol gave the title product (**3j**) as a solid (0.110 g, 0.48 mmol, 37%) mp 60-61 °C (mp lit.3 61-62 °C). max (CHCl3)/cm–1 1610m, 1512s, 1250s. H (270 MHz) 7.25–7.07 (4 H, m, Ar*H*), 7.01 (2 H, d, *J* 8.7 Hz, Ar(2',6')H), 6.75 (2 H, d, *J* 8.9 Hz, Ar(3',5')H), 3.75 (3 H, s, O*Me*); C (68 MHz) 158.1 (ArC(4´)-OMe), 144.2 (Ar*C*(2)-NO2), 136.0 (Ar*C*(1,1´)-Ar), 128.7 (Ar*C*(3,5)H), 128.6 (Ar*C*(2',6')H), 127.6 (Ar*C*(4)H), 126.3 (Ar*C*(6)H), 114.0 (Ar*C*(3',5')H), 55.3 (O*Me*). *m/z* (EI) 229 (*M*+, 6%), 214 (*M*+– Me, 100), 198 (*M*+– OMe, 20), 183 (*M*+– NO2, 5). Found: *M*+ 229.0734. C13H11N1O3 requires: 229.0739.

**2-Nitro-4-trifluoromethylbiphenyl (3k)**

From 4-fluoro-3-nitrobenzotrifluoride (**1c**) (0.18 mL, 1.29 mmol) and phenylboronic acid (**2a**) (0.320 g, 2.58 mmol); FCC (eluant: 10% DCM–hexane) and purification with a Kugelrohr (250 °C, 1 Torr) gave the title product (**3k**) as a yellow oil (0.230 g, 0.86 mmol, 67%) (mp lit.10 from methanol, 45-46 °C ). (Found: C, 58.62; H, 3.13; N, 5.19. C13H8NO2F3 requires: C, 58.44; H, 3.02; N, 5.24%). nmax (neat)/cm–1 1628m, 1537s, 1325s, 1135s, 700s. dH (270 MHz) 8.13 (1 H, dd, *J* 0.5, 1.2 Hz, Ar(3)*H*), 7.88 (1 H, ddd, *J* 0.5, 1.2, 7.9 Hz, Ar(5)*H*), 7.61 (1 H, d, *J* 7.9 Hz, Ar(6)*H*), 7.49–7.32 (5 H, m, PhH); dC (68 MHz) 149.2 (Ar*C*(2)-NO2), 139.9 (Ar*C*(1)‑Ar), 136.1 (Ar*C*(1')-Ar), 133.0 (Ar*C*(6)H), 132.0 (q, 2*J*C-F 129 Hz, Ar*C*(4)-CF3), 129.1 (Ph*C*(4')H), 129.0 (Ph*C*(2',6')H), 128.9 (q, 3*J*C-F 3 Hz, Ar*C*(5)H), 127.8 (Ph*C*(3',5')H), 123.0 (q, 1*J*C-F 272 Hz, *C*F3), 121.5 (q, 3*J*C-F 4 Hz, Ar*C*(3)H). *m/z* (EI) 267 (*M*+, 35%), 250 (*M*+– OH, 65), 222 (*M*+– NO2 + H, 16, 152 (75). Found: *M*+ 267.0506. C13H8NO2F3 requires: 267.0507.

**2'-Methyl-2-nitro-4-trifluoromethylbiphenyl (3l)**

From 4-fluoro-3-nitrobenzotrifluoride (**1c**) (0.18 mL, 1.29 mmol) and 2-methylbenzeneboronic acid (**2h**) (0.350 g, 2.58 mmol); FCC (eluant: 10% DCM–hexane) and purification with a Kugelrohr (250 °C, 1 Torr) gave the *title product* (**3l**) as a yellow oil (0.110 g, 0.39 mmol, 30%). (Found: C, 59.85; H, 3.51; N, 4.36. C14H10F3NO2 requires: C, 59.79; H, 3.58; N, 4.98%). nmax (neat)/cm–1 1632m, 1539s, 1325s, 1136s, 761s. dH (270 MHz) 8.26 (1 H, d, *J* 1.0 Hz, Ar(3)*H*), 7.89 (1 H, dd, *J* 1.5, 8.2 Hz, Ar(5)*H*), 7.50 (1 H, d, *J* 8.0 Hz, Ar(6)*H*), 7.37–7.06 (4 H, m, ArH), 2.11 (3 H, s, *Me*); dC (68 MHz) 149.1 (Ar*C*(2)-NO2), 140.2 (Ar*C*(2')-Me), 136.1 (Ar*C*(1)‑Ar), 135.4.1 (Ar*C*(1')‑Ar), 133.3 (ArC(6)H), 131.8 (q, 2*J*F-C 142 Hz, Ar*C*(4)-CF3), 130.3 (Ar*C*H), 129.1 (q, 3*J*F‑C 3.6 Hz, Ar*C*(5)H), 128.9, 128.1, 126.1 (Ar*C*H), 123.0 (q, 1*J*C-F 272 Hz, *C*F3), 121.6 (q, 3*J*F-C 4.1 Hz, Ar*C*(3)H), 19.9 (*Me*). *m/z* (CI) 299 (*M*+ + NH4, 100%), 281 (*M*+, 5), 264 (*M*+– OH, 30), (*M*+– MeO, 10), 236 (*M*+– NO2 + H, 5), 165 (30). Found: *M*+ + NH4 299.1009. C14H14F3N2O2 requires: 299.1007.

**4-Methyl-2-nitrobiphenyl (3m)**

From 4-fluoro-3-nitrotoluene (**1d**) (0.200 g, 1.29 mmol) and phenylboronic acid (**2a**) (0.320 g, 2.58 mmol); FCC (eluant: 10% DCM–hexane) and purification with a Kugelrohr (250 °C, 1 Torr) gave the title product (**3m**) as a yellow oil (0.060 g, 0.28 mmol, 22%). (mp lit.11 from petrolether 49 °C). (Found: C, 73.14; H, 5.30; N, 6.66. C13H11NO2 requires: C, 73.23; H, 5.20; N, 6.57%). nmax (neat)/cm–1 1602m, 1522s, 1348s, 829s, 699s. dH (270 MHz) 7.80 (1 H, d, *J* 8.2 Hz, Ar(6)*H*), 7.46–7.22 (7 H, m, Ar*H*), 2.45 (3 H, s, *Me*); dC (68 MHz) 147.0 (Ar*C*(2)-NO2), 143.5 (Ar*C*(4)-Me), 137.9 (Ar*C*(1)‑Ar), 136.6 (Ph(1')-Ar), 132.7, 128.7 (Ar*C*H), 128.6 (Ph*C*(2',6')H), 128.1 (PhC(4')H), 127.9 (Ph*C*(3',5')H), 124.4 (Ar*C*H), 21.5 (*Me*). *m/z* (EI) 213 (*M*+, 70%), 196 (*M*+– OH, 85), 168 (*M*+– NO2 + H, 75), 152 (*M*+– NO2 – Me, 90). Found: *M*+ 213.0786. C13H11NO2 requires: 213.0790.

**4-Methoxy-2-nitrobiphenyl (3n)**

From 1-fluoro-4-methoxy-2-nitro-benzene **(1e)** (0.220 g, 1.29 mmol) and phenylboronic acid (**2a**) (0.320 g, 2.58 mmol); FCC (eluant: 5% ethyl acetate–hexane) gave the *title product* (**3n**) as a yellow oil (0.073 g, 0.32 mmol, 25%). nmax (neat)/cm–1 1588s, 1512s, 1479s, 1341s, 1302s, 1225s, 699s. dH (270 MHz) 7.97 (1 H, d, *J* 9.2 Hz, Ar(6)*H*), 7.43–7.38 (5 H, m, Ph*H*), 6.93 (1 H, dd, *J* 2.7, 9.2 Hz, Ar(5)*H*), 6.84 (1 H, d, *J* 2.7 Hz, Ar(3)*H*), 3.89 (3 H, s, O*Me*); dC (68 MHz) 162.5 (Ar*C*(4)-OMe), 142.0 (Ar*C*(2)-NO2), 139.5 (Ar*C*(1)‑Ar), 138.3 (Ph(1')-Ar), 128.6 (Ph*C*(2',6')H), 128.1 (Ph*C*(4')H), 127.8 (Ph*C*(3',5')H), 127.0, 117.1, 113.1 (Ar*C*H), 56.0 (O*Me*). *m/z* (EI) 229 (*M*+, 15%), 212 (*M*+– OH, 10), 184 (*M*+– NO2 + H, 5), 168 (*M*+– NO2 – Me, 5), 152 (*M*+– NO2 – MeO, 25).

**1-Fluoro-4-methoxy-2-nitrobenzene (1e)**

4-Fluoro-3-nitrophenol (2.50 g, 15.9 mmol), potassium carbonate (3.3 g, 23.87 mmol) and iodomethane (1.5 mL, 23.87 mmol) were stirred in acetonitrile (100 mL) over night at r.t. Ethyl acetate (300 mL) was added and the mixture was washed twice with water (100 mL) and once with brine followed by drying (MgSO4). The solvent was removed and the crude product was purified in a Kugelrohr (200 °C, 1 Torr) to give the title product (**1e**) as a yellow solid (2.25 g, 13.2 mmol, 83%), mp 52–53 °C (Found: C, 49.24; H, 3.44; N, 8.03. C7H6FNO3 requires: C, 49.13; H, 3.53; N, 8.18%). nmax (CHCl3)/cm–1 1610s, 1520s, 1346s, 1298s, 1166m, 1101m, 842m. dH (270 MHz) 8.10–8.00 (1 H, m, ArH), 6.77–6.69 (2 H, m, ArH), 3.89 (3 H, s, O*Me*); dC (68 MHz) 165.4 (d, 4*J*C-F 12 Hz, Ar*C*(4)-OMe), 157.5 (d, 1*J*C-F 264 Hz Ar*C*(1)-F), 131.0 (Ar*C*(2)-NO2), 127.9 (Ar*C*(5)H), 110.4 (d, 3*J*C-F 3 Hz Ar*C*(3)H), 103.2 (d, 2*J*C-F 24 Hz Ar*C*(6)H), 56.4 (O*Me*). *m/z* (EI) 171 (*M*+, 100%), 155 (*M*+– O, 10), 141 (*M*+– MeO +H, 55), 125 (*M*+– NO2, 6), 110 (125 – Me, 65). Found: *M*+ 171.0333. C7H6N1O3F requires: 171.0332.

**2-Fluoro-5-trifluoromethylbenzoic acid methyl ester (1h)**

2-Fluoro-5-trifluoromethylbenzoic acid (2.50 g, 15.9 mmol), potassium carbonate (3.3 g, 23.87 mmol) and iodomethane (1.5 mL, 23.87 mmol) were stirred in acetonitrile (100 mL) over night at r.t. Ethyl acetate (300 mL) was added and the mixture was washed twice with water (100 mL) and once with brine followed by drying (MgSO4). The solvent was removed and the crude product was purified in a Kugelrohr (200 °C, 1 Torr) to give the *title product* (**1h**) as a yellow oil (0.3 g, 1.34 mmol, 8%). nmax (neat)/cm–1 1740s, 1427s, 1335s, 1138s, 912s. dH (270 MHz) 8.05 (1 H, dt, *J* 0.5, 7.4 Hz, Ar(3)*H*), 7.46 (1 H, dd, *J* 0.5, 8.4 Hz, Ar(4)*H*), 7.41 (1 H, dd, *J* 1.0, 10.4 Hz, Ar(6)*H*), 3.95 (3 H, s, O*Me*); *m/z* (EI) 222 (*M*+, 20%), 191 (*M*+– MeO, 100), 163 (*M*+– COOMe, 25). Found: *M*+ 222.0303. C9H6F4O2 requires: 222.0304.

EN.REFLIST
